# Supplementary material for: Three-dimensionally ordered mesoporous carbons activated by hot ammonia treatment as high-performance anode materials in lithium-ion batteries
Source: Royal Society of Chemistry journal article supplement (doi:10.1039/c5nj00888c), 2015-01-01
Supplement: c5nj00888c1.pdf [file c5nj00888c1.pdf]

## *Supporting Information*

# Three-dimensionally ordered mesoporous carbons activated by hot ammonia treatment as a high-performance anode material in lithium-ion batteries

*Bin Han,<sup>a</sup> Eun Joo Lee,<sup>a</sup> Won Ho Choi,<sup>a</sup> Won Cheol Yoo<sup>\*b</sup> and Jin Ho Bang<sup>\*ab</sup>*

Department of Bionanotechnology and Department of Chemistry and Applied Chemistry, Hanyang University, 55 Hanyangdaehak-ro, Sangnok-gu, Ansan, Kyeonggi-do 426-791, Republic of Korea

Email: jbang@hanyang.ac.kr (J. H. Bang), wcyoo@hanyang.ac.kr (W. C. Yoo)

<sup>a</sup>Department of Bionanotechnology

<sup>b</sup>Department of Chemistry and Applied Chemistry

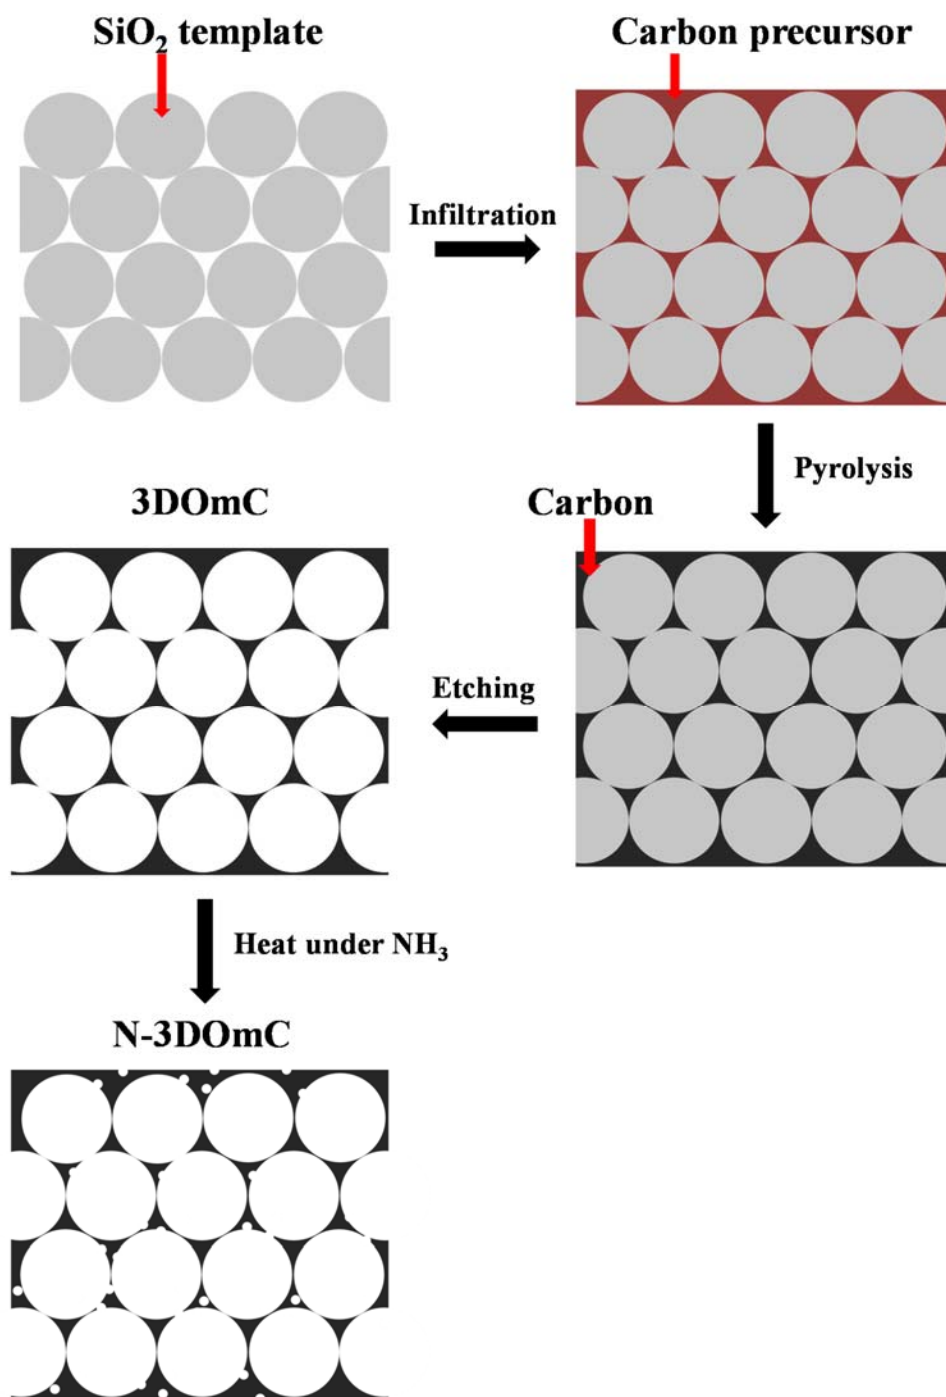

**Scheme S1** Schematic illustration of the synthesis of 3DOmCs and N-3DOmCs.

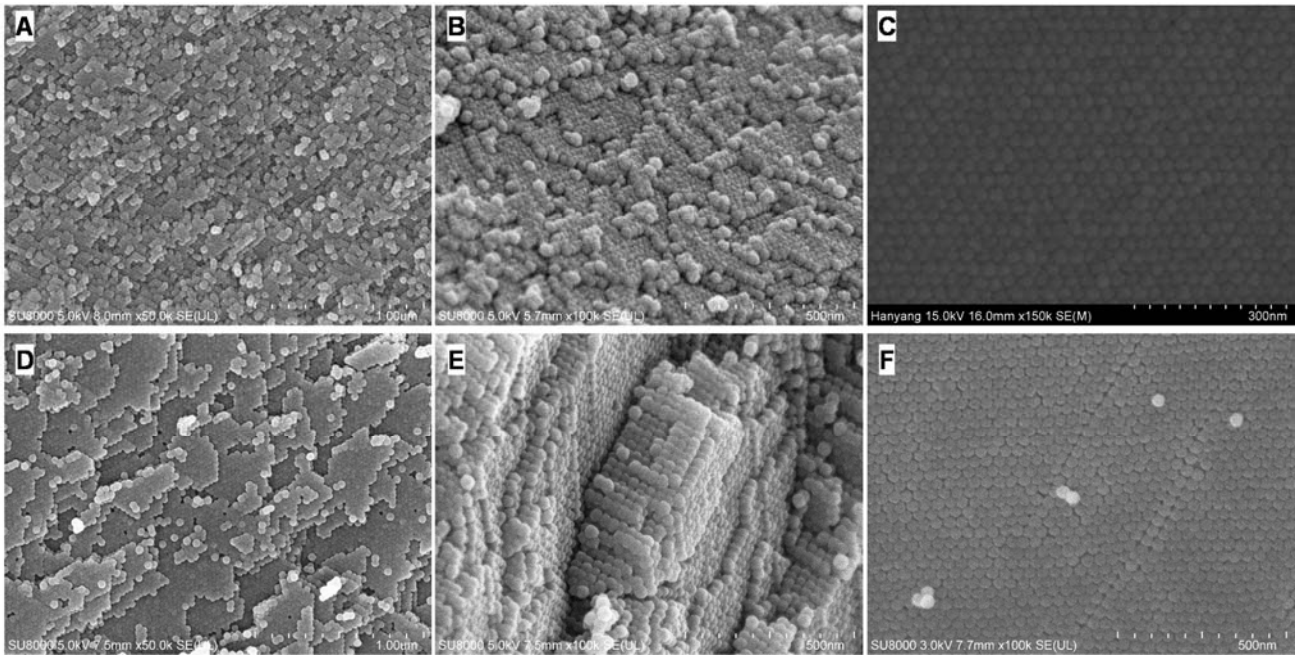

**Fig. S1** SEM images of SiO<sub>2</sub> templates used for (A-C) 16 nm and (D-F) 32 nm 3DOMCs.

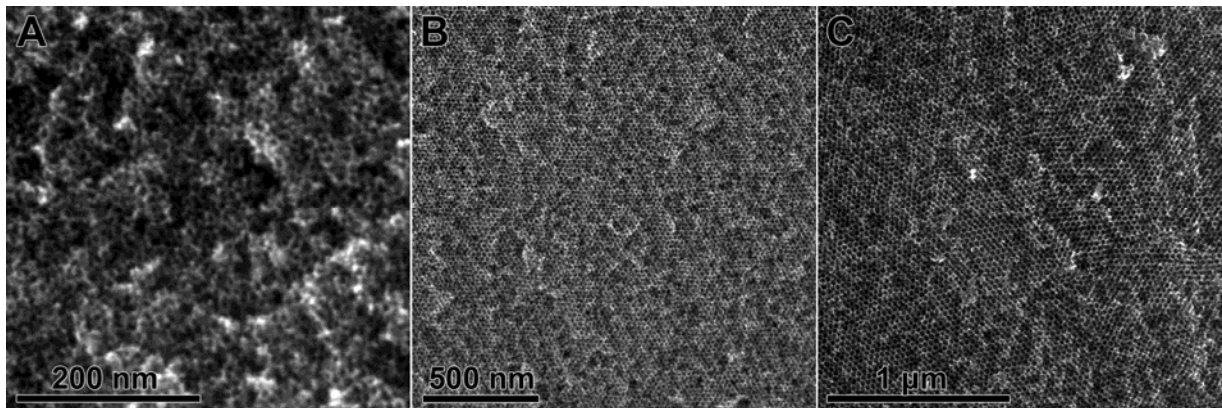

**Fig. S2** Additional SEM images of 3DOMCs with pore size (A) 8 nm, (B) 16 nm, and (C) 32 nm.

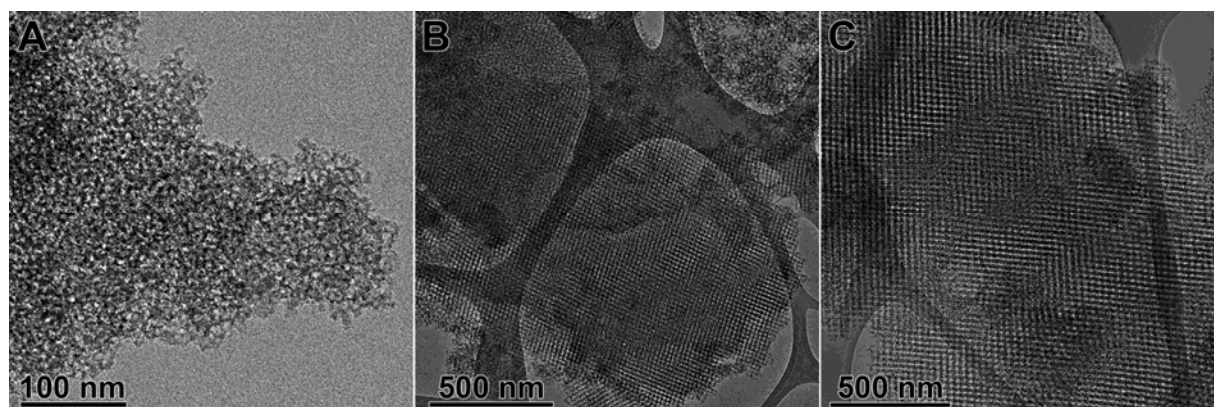

**Fig. S3** Additional TEM images of 3D OmCs with pore size (A) 8 nm, (B) 16 nm, and (C) 32 nm.

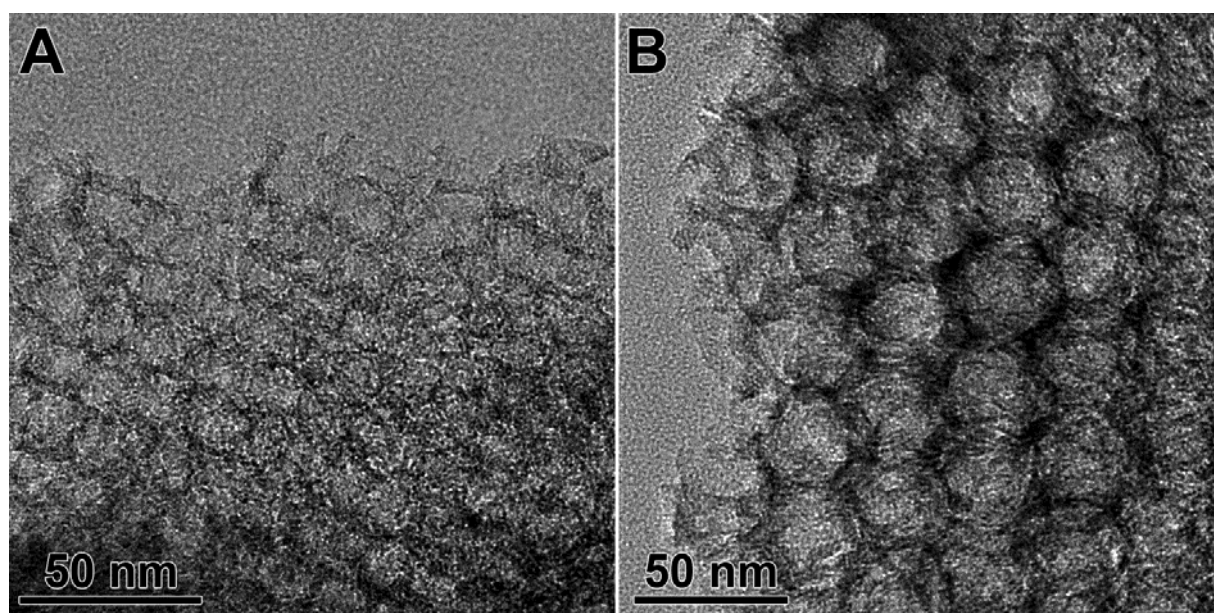

**Fig. S4** Additional TEM images of N-3D OmCs with pore size (A) 16 nm and (B) 32 nm.

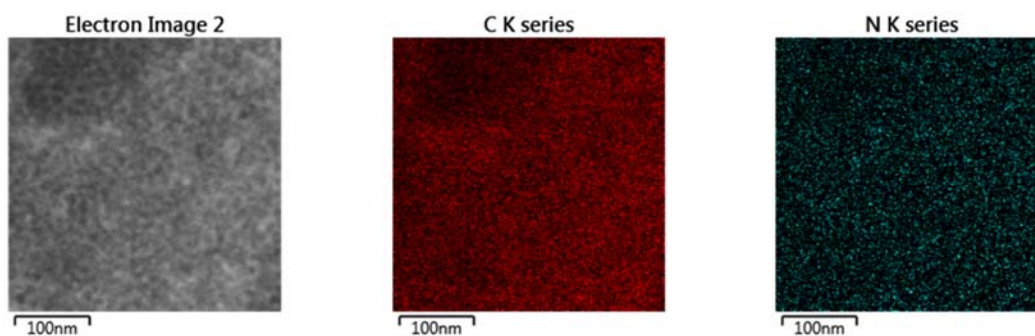

**Fig. S5** TEM-EDS mapping analysis of 16nm\_N-3DOmC.

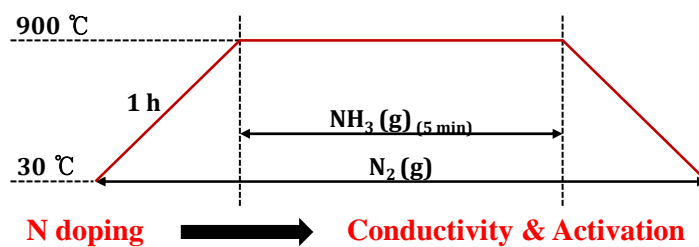

**Scheme S2** Schematic illustration of  $\text{NH}_3$  heat treatment of 3DOmCs for the fabrication of N-3DOmCs.

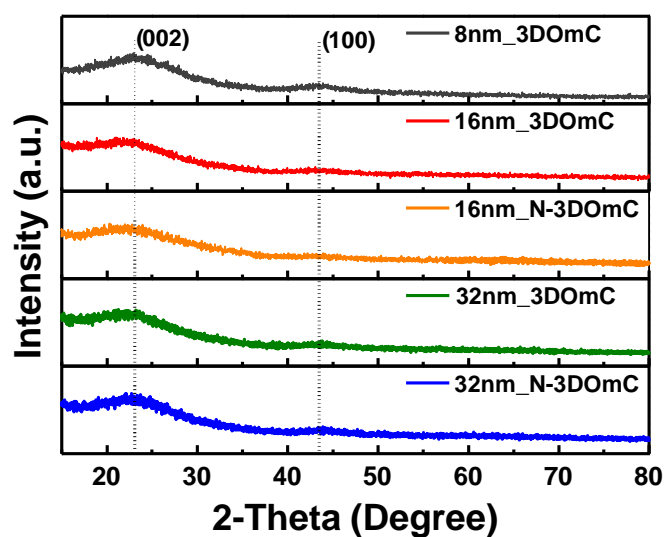

**Fig. S6** XRD patterns of 3DOmCs and N-3DOmCs.

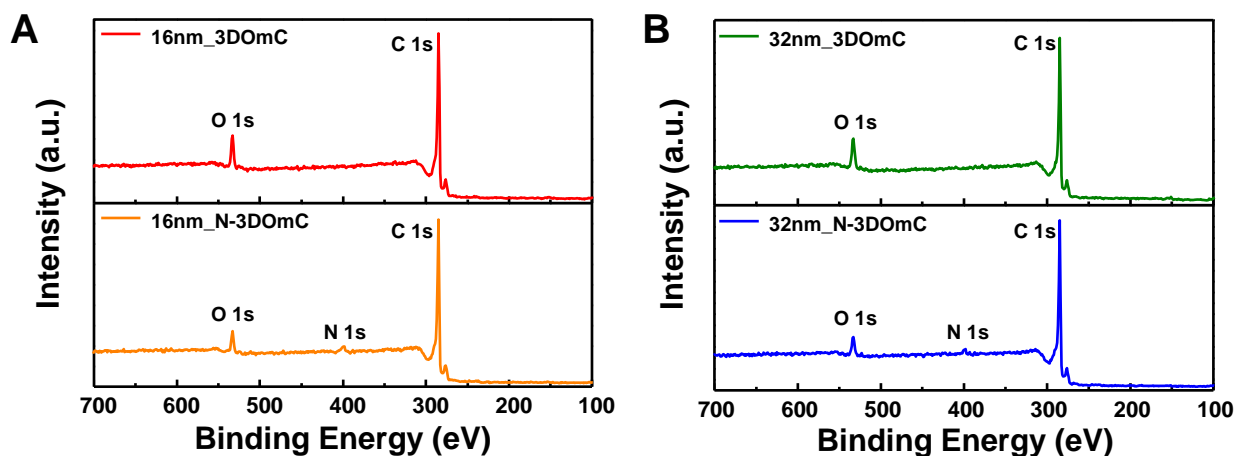

**Fig. S7** XPS spectra of (A) 16nm\_3DOmCs and (B) 32nm\_3DOmCs before and after  $\text{NH}_3$  heat treatment.

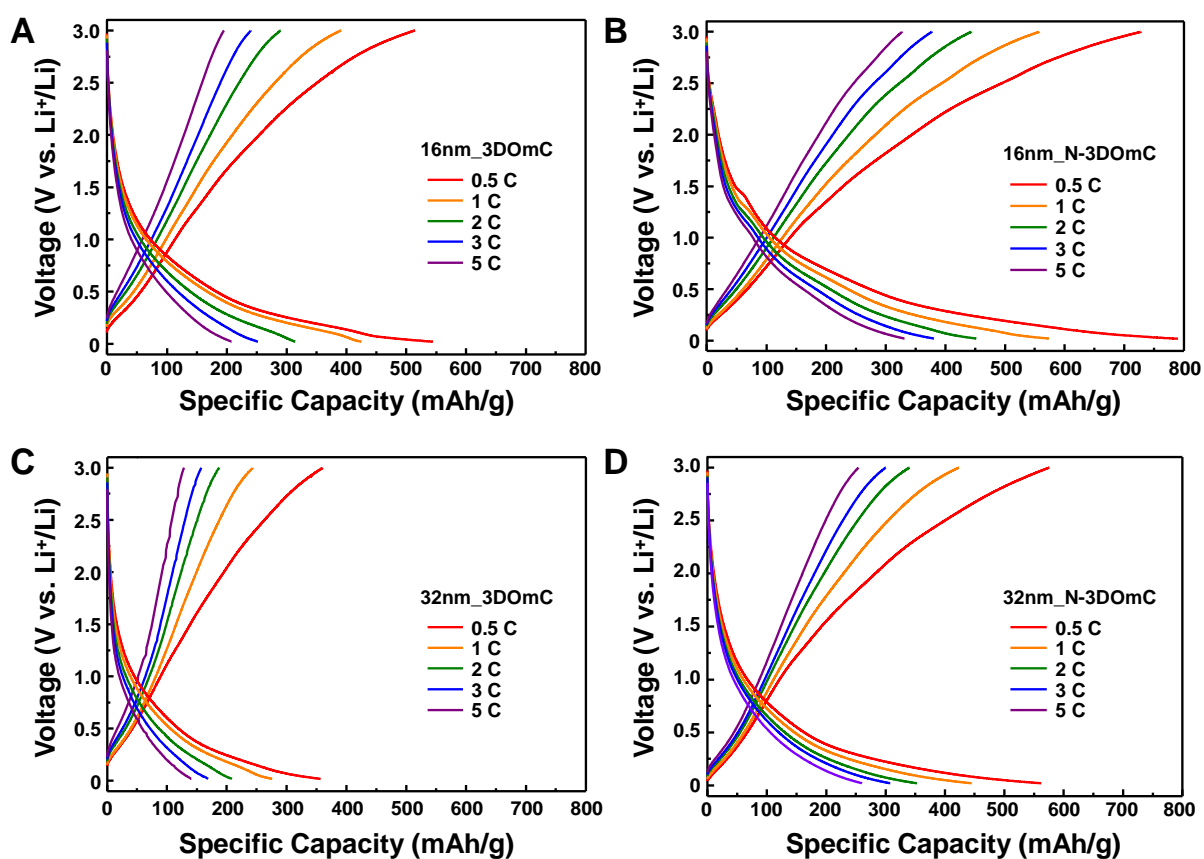

**Fig. S8** Charge/discharge curves of (A) 16nm\_3DOmC, (B) 16nm\_N-3DOmC, (C) 32nm\_3DOmC, and (D) 32nm\_N-3DOmC anodes at various C-rates.

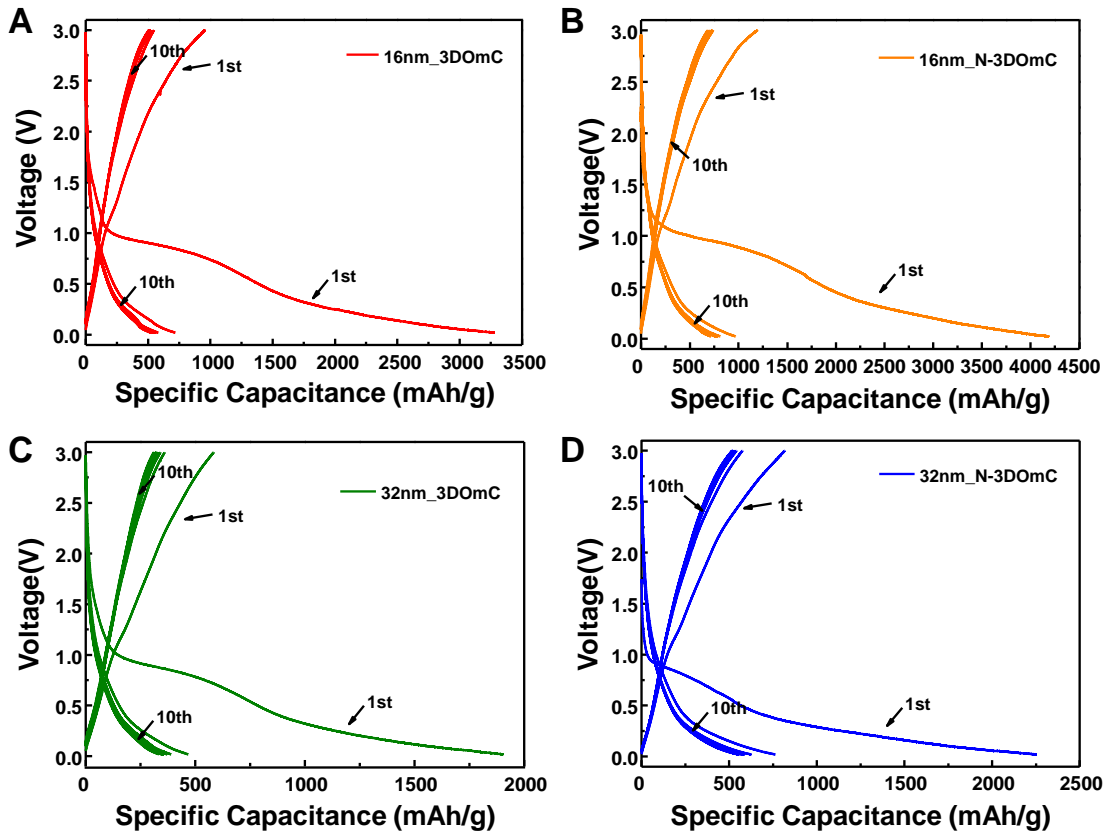

**Fig. S9** Initial charge/discharge curves of A) 16nm\_3DOmC, (B) 16nm\_N-3DOmC, (C) 32nm\_3DOmC, and (D) 32nm\_N-3DOmC anodes. Note that the 1<sup>st</sup> cycle was recorded at 0.1 C, whereas 2<sup>nd</sup>~10<sup>th</sup> cycles at 0.5 C.

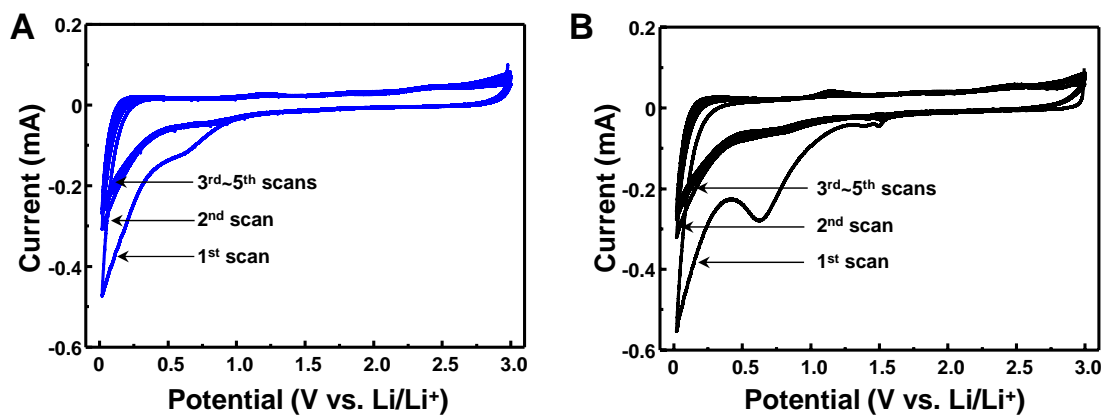

**Fig. S10** Cyclic voltammograms of (A) 16nm\_3DOmC and (B) 16nm\_N-3DOmC at a scan rate of 0.1 mV/s.

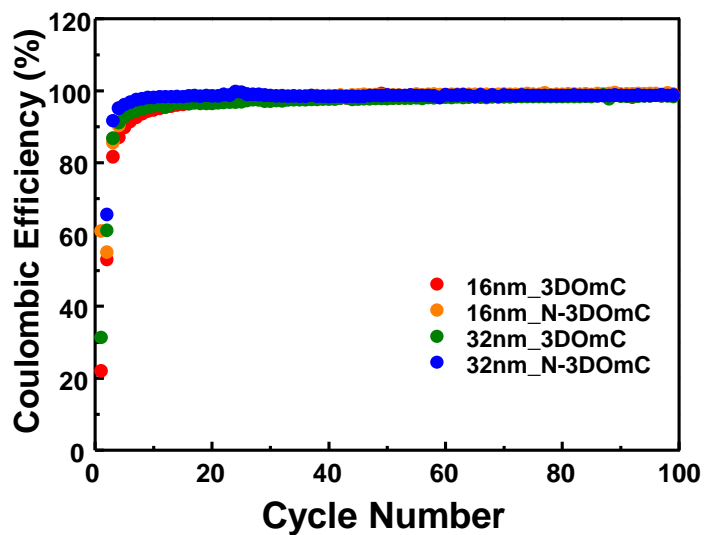

**Fig. S11** Coulombic efficiency of 3DOmCs and N-3DOmCs.

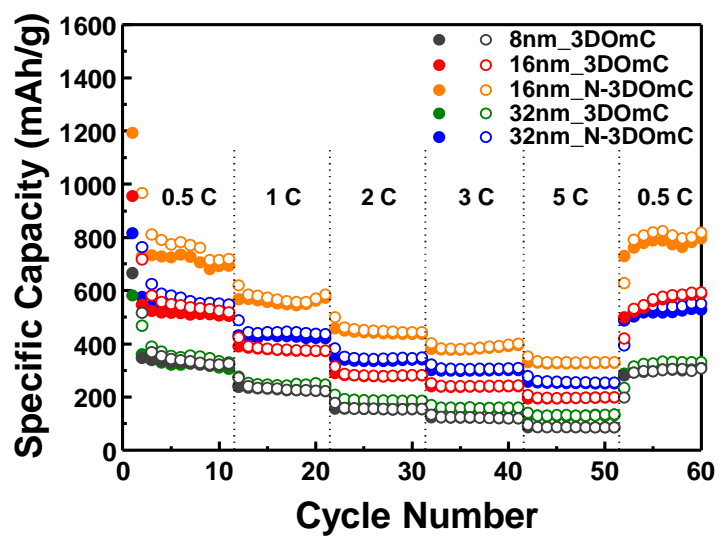

**Fig. S12** Specific capacities of 3DOmCs and N-3DOmCs cycled at various C-rates.



**Table S1.** Voltage measurements of 16nm\_3DOmC and 16nm\_N-3DOmC at a given current (0.01 mA), which reflect the electrical conductivity of these carbons. Since  $R=V/I$ , the larger voltages, the higher resistances (also higher resistivity).

| Trial at 0.01 mA | 3DOmC  | N-3DOmC |
|------------------|--------|---------|
| 1                | 1.6 V  | 0.38 V  |
| 2                | 1.4 V  | 0.8 V   |
| 3                | 1.3 V  | 1.2 V   |
| 4                | 1.5 V  | 0.5 V   |
| 5                | 1.5 V  | 0.4 V   |
| 6                | 1.4 V  | 1.2 V   |
| Average          | 1.45 V | 0.75 V  |

**Calculation of density of 3DOmC materials:**

- Assumption,

1. The density of solid carbon is assumed to be 2 g/cc (usually 1.8–2.1 g/cc).
2. The silica particles are packed as face-centered cubic array (packing density = 74 %).
3. The size of silica sphere is assumed to be uniform.
4. The density of air at 25 °C is 0.00118 g/cc.
5. The pores of 3DOmCs consist of mesopores and micropores, and the information of pore volumes of both pores is determined by nitrogen-sorption measurements.

Then, the 3DOmC has 74 % free volume filled with air at ambient condition, because it is the inverse structure of the closed packed silica templates. → 26 % of carbon for 3DOmC sample

So the density of 3DOmC without considering microporosity is

$$(0.26 \times 2 \text{ g/cc}) + (0.74 \times 0.00118 \text{ g/cc}) = 0.52 \text{ g/cc}$$

Then, the microporosity of the 3DOmC samples now is needed to be considered as follows:

For example, 32nm\_N-3DOmC has 0.169 cc/g of microporosity, then, the emptiness inside 32nm\_N-3DOmC is 33.8 % (carbon fraction is then 66.2 %).

When considering the microporosity for 32nm\_N-3DOmC, the calculated density is

$$\therefore (0.26 \times 0.662 \times 2 \text{ g/cc}) + (0.26 \times 0.338 \times 0.00118 \text{ g/cc}) + (0.74 \times 0.00118 \text{ g/cc}) = 0.345 \text{ g/cc}$$
